# Supplementary material for: Thiacloprid suspension formula optimization by a response surface methodology
Source: Royal Society of Chemistry journal article supplement (doi:10.1039/c5ra00292c), 2015-01-01
Supplement: c5ra00292c1.pdf [file c5ra00292c1.pdf]

## Supplementary Information

### Thiacloprid suspension formula optimization by a response surface methodology

Bei-xing Li, Wei-chang Wang, Kai Wang, Da-xia Zhang, Lei Guan and Feng Liu\*

Key Laboratory of Pesticide Toxicology & Application Technique, Shandong Agricultural University, Tai'an, P. R. China. Fax/Tel: 86 0538 8242611; E-mail: [fliu@sdau.edu.cn](mailto:fliu@sdau.edu.cn)

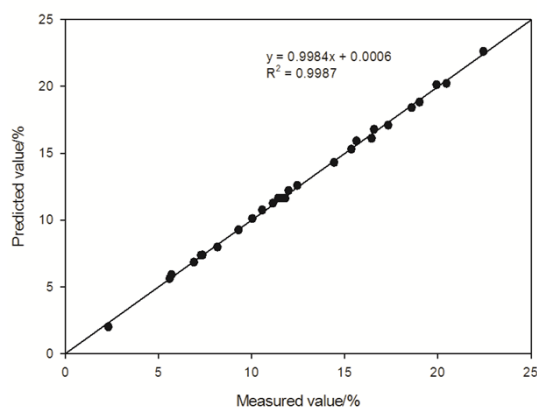

**Figure S1.** Measured values vs. predicted values for modeled centrifugal sedimentation ratio.

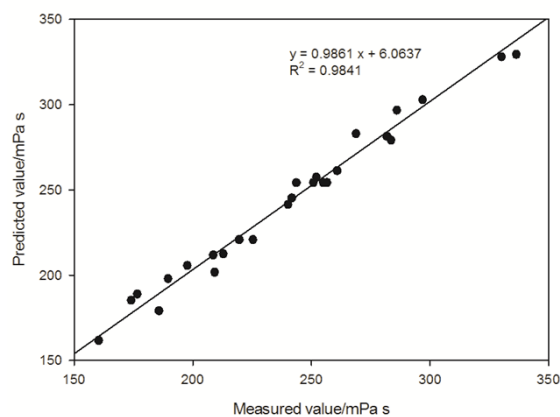

**Figure S2.** Measured values vs. predicted values for modeled viscosity.

**Table S1.** Proposed experiments by RSM and their corresponding output parameters.

| No. | <sup>a</sup> Independent variable |        |             |        | Aqueous separation ratio/% | Centrifugal sedimentation ratio/% | Viscosity/mPa·s  | Dispersibility | Suspensibility/%    |                     |
|-----|-----------------------------------|--------|-------------|--------|----------------------------|-----------------------------------|------------------|----------------|---------------------|---------------------|
|     | Tersperse 2700                    | AE1601 | Xanthan gum | Veegum |                            |                                   |                  |                | Before storage      | After hot storage   |
| 1   | -1                                | -1     | -1          | -1     | 16.83 ± 0.12 a             | 22.45 ± 0.37 a                    | 176.60 ± 1.16 t  | Excellent      | 94.78 ± 0.53 abcdef | 93.79 ± 0.58 cdefg  |
| 2   | 1                                 | -1     | -1          | -1     | 15.11 ± 0.14 b             | 19.93 ± 0.25 b                    | 160.34 ± 0.10 u  | Excellent      | 96.05 ± 0.23 abc    | 94.71 ± 0.42 abcde  |
| 3   | -1                                | 1      | -1          | -1     | 10.47 ± 0.12 d             | 16.58 ± 0.09 e                    | 189.62 ± 0.08 r  | Excellent      | 95.70 ± 0.89 abcd   | 93.09 ± 0.52 defghi |
| 4   | 1                                 | 1      | -1          | -1     | 8.82 ± 0.14 e              | 14.43 ± 0.39 g                    | 209.22 ± 0.20 p  | Excellent      | 96.34 ± 0.53 ab     | 96.16 ± 0.33 a      |
| 5   | -1                                | -1     | 1           | -1     | 7.67 ± 0.07 f              | 16.45 ± 0.11 e                    | 241.76 ± 0.39 kl | Fine           | 95.45 ± 0.19 abcde  | 94.06 ± 0.23 bcdef  |
| 6   | 1                                 | -1     | 1           | -1     | 4.70 ± 0.07 h              | 11.14 ± 0.33 jk                   | 240.16 ± 0.19 l  | Excellent      | 95.97 ± 0.42 abc    | 91.40 ± 0.49 i      |
| 7   | -1                                | 1      | 1           | -1     | 6.35 ± 0.11 g              | 11.99 ± 0.09 hi                   | 243.64 ± 0.81 k  | Fine           | 93.68 ± 0.42 cdef   | 93.90 ± 0.33 bcdefg |
| 8   | 1                                 | 1      | 1           | -1     | 4.67 ± 0.10 h              | 7.28 ± 0.19 o                     | 281.92 ± 0.11 f  | Fine           | 95.17 ± 0.45 abcdef | 95.27 ± 0.26 abc    |
| 9   | -1                                | -1     | -1          | 1      | 9.98 ± 0.05 d              | 18.60 ± 0.07 c                    | 212.90 ± 0.13 o  | Fine           | 93.30 ± 0.48 def    | 91.33 ± 0.30 i      |
| 10  | 1                                 | -1     | -1          | 1      | 6.60 ± 0.08 g              | 15.64 ± 0.32 f                    | 174.02 ± 0.60 t  | Excellent      | 95.22 ± 0.85 abcdef | 94.11 ± 0.62 bcdef  |
| 11  | -1                                | 1      | -1          | 1      | 4.55 ± 0.12 h              | 12.46 ± 0.31 h                    | 252.16 ± 0.14 j  | Fine           | 96.06 ± 0.25 abc    | 95.12 ± 0.26 abcd   |
| 12  | 1                                 | 1      | -1          | 1      | 1.50 ± 0.11 no             | 10.04 ± 0.51 l                    | 260.92 ± 0.59 h  | Excellent      | 95.49 ± 0.61 abcde  | 94.37 ± 0.58 abcde  |
| 13  | -1                                | -1     | 1           | 1      | 4.48 ± 0.12 hi             | 10.57 ± 0.24 kl                   | 268.86 ± 0.28 g  | Fine           | 93.19 ± 0.27 def    | 93.31 ± 0.28        |
| 14  | 1                                 | -1     | 1           | 1      | 1.81 ± 0.10 n              | 5.70 ± 0.28 p                     | 283.66 ± 0.83 ef | Fine           | 94.10 ± 0.37 bcdef  | 93.94 ± 0.23 bcdef  |
| 15  | -1                                | 1      | 1           | 1      | 3.92 ± 0.10 ij             | 6.91 ± 0.19 o                     | 330.22 ± 0.87 c  | Fine           | 95.43 ± 0.46 abcde  | 94.42 ± 0.25 abcde  |
| 16  | 1                                 | 1      | 1           | 1      | 1.22 ± 0.03 o              | 2.31 ± 0.15 q                     | 345.78 ± 0.08 a  | Fine           | 94.80 ± 0.32 abcdef | 94.25 ± 0.22 abcde  |
| 17  | -2                                | 0      | 0           | 0      | 6.90 ± 0.10 g              | 15.36 ± 0.21 f                    | 219.58 ± 0.62 n  | Fine           | 93.29 ± 0.53 def    | 92.12 ± 0.50 fghi   |
| 18  | 2                                 | 0      | 0           | 0      | 2.74 ± 0.07 m              | 8.17 ± 0.24 n                     | 225.38 ± 0.08 m  | Excellent      | 96.05 ± 0.40 abc    | 95.88 ± 0.36 ab     |
| 19  | 0                                 | -2     | 0           | 0      | 8.91 ± 0.06 e              | 17.34 ± 0.35 d                    | 208.64 ± 0.14 p  | Excellent      | 93.12 ± 0.75 ef     | 91.89 ± 0.30 ghi    |
| 20  | 0                                 | 2      | 0           | 0      | 3.04 ± 0.13 lm             | 7.36 ± 0.14 o                     | 286.08 ± 0.11 e  | Excellent      | 94.94 ± 0.25 abcdef | 94.61 ± 0.36 abcde  |
| 21  | 0                                 | 0      | -2          | 0      | 11.42 ± 0.17 c             | 20.47 ± 0.25 b                    | 185.76 ± 0.10 s  | Excellent      | 94.77 ± 0.35 abcdef | 93.65 ± 0.01 cdefg  |
| 22  | 0                                 | 0      | 2           | 0      | 1.77 ± 0.08 no             | 5.60 ± 0.26 p                     | 336.46 ± 1.01 b  | Fine           | 93.55 ± 0.42 cdef   | 92.92 ± 0.36 efghi  |
| 23  | 0                                 | 0      | 0           | -2     | 14.83 ± 0.13 b             | 19.02 ± 0.19 c                    | 197.68 ± 0.08 q  | Excellent      | 92.84 ± 0.16 f      | 91.54 ± 0.16 hi     |
| 24  | 0                                 | 0      | 0           | 2      | 3.64 ± 0.08 jk             | 9.30 ± 0.29 m                     | 296.94 ± 0.48 d  | Fine           | 97.02 ± 0.21 a      | 94.25 ± 0.26 abcde  |
| 25  | 0                                 | 0      | 0           | 0      | 3.50 ± 0.08 jkl            | 11.64 ± 0.16 ij                   | 255.10 ± 0.49 i  | Fine           | 94.21 ± 0.41 bcdef  | 93.47 ± 0.36 cdefgh |
| 26  | 0                                 | 0      | 0           | 0      | 3.40 ± 0.08 jkl            | 11.80 ± 0.17 hij                  | 256.66 ± 0.48 i  | Fine           | 94.96 ± 0.20 abcdef | 93.93 ± 0.38 bcdefg |
| 27  | 0                                 | 0      | 0           | 0      | 3.14 ± 0.09 klm            | 11.43 ± 0.11 ij                   | 250.88 ± 0.08 j  | Fine           | 94.52 ± 0.34 abcdef | 93.77 ± 0.35 cdefg  |

<sup>a</sup>The levels of adjuvants were coded value. Each data of dependent variable is the mean ± SE. Data of the same index with different lowercase letters are significantly different at  $p < 0.05$  level by Tukey test.

**Table S2.** The ANOVA for the aqueous separation ratio

| Source                        | Coefficient | F-value | Sequential <i>p</i> -value |
|-------------------------------|-------------|---------|----------------------------|
| Model                         | -           | 248.39  | < 0.0001                   |
| Lack of Fit                   | -           | 4.51    | 0.1951                     |
| Intercept                     | 3.35        | -       | -                          |
| X <sub>1</sub>                | -1.17       | 231.62  | < 0.0001*                  |
| X <sub>2</sub>                | -1.56       | 409.53  | < 0.0001*                  |
| X <sub>3</sub>                | -2.43       | 995.17  | < 0.0001*                  |
| X <sub>4</sub>                | -2.62       | 1158.72 | < 0.0001*                  |
| X <sub>1</sub> X <sub>2</sub> | 0.10        | 1.20    | 0.2941                     |
| X <sub>1</sub> X <sub>3</sub> | -0.01       | 0.02    | 0.9037                     |
| X <sub>1</sub> X <sub>4</sub> | -0.24       | 6.21    | 0.0284*                    |
| X <sub>2</sub> X <sub>3</sub> | 1.29        | 187.43  | < 0.0001*                  |
| X <sub>2</sub> X <sub>4</sub> | 0.14        | 2.36    | 0.1503                     |
| X <sub>3</sub> X <sub>4</sub> | 1.04        | 121.54  | < 0.0001*                  |
| X <sub>1</sub> <sup>2</sup>   | 0.39        | 22.89   | 0.0004*                    |
| X <sub>2</sub> <sup>2</sup>   | 0.68        | 69.05   | < 0.0001*                  |
| X <sub>3</sub> <sup>2</sup>   | 0.83        | 104.28  | < 0.0001*                  |
| X <sub>4</sub> <sup>2</sup>   | 1.49        | 334.59  | < 0.0001*                  |

Note: \* indicates significant impact.

**Table S3.** Fitness of centrifugal sedimentation ratio to different models.

| Model                | Sequential <i>p</i> -value | Lack of fit <i>p</i> -value | Adjusted R <sup>2</sup> | Predicted R <sup>2</sup> |
|----------------------|----------------------------|-----------------------------|-------------------------|--------------------------|
| Linear               | < 0.0001                   | 0.0320                      | 0.9645                  | 0.9546                   |
| 2FI                  | 0.0429                     | 0.0462                      | 0.9765                  | 0.9770                   |
| Quadratic polynomial | < 0.0001                   | 0.4323                      | 0.9980                  | 0.9951                   |
| Cubic polynomial     | 0.6310                     | 0.2804                      | 0.9977                  | 0.9638                   |

**Table S4.** The ANOVA for the centrifugal sedimentation ratio

| Source                        | Coefficient | F-value | Sequential <i>p</i> -value |
|-------------------------------|-------------|---------|----------------------------|
| Model                         | -           | 940.72  | < 0.0001                   |
| Lack of Fit                   | -           | 1.67    | 0.4323                     |
| Intercept                     | 11.62       | -       | -                          |
| X <sub>1</sub>                | -1.83       | 1511.99 | < 0.0001*                  |
| X <sub>2</sub>                | -2.43       | 2677.50 | < 0.0001*                  |
| X <sub>3</sub>                | -3.65       | 6005.32 | < 0.0001*                  |
| X <sub>4</sub>                | -2.39       | 2590.99 | < 0.0001*                  |
| X <sub>1</sub> X <sub>2</sub> | 0.11        | 3.76    | 0.0763                     |
| X <sub>1</sub> X <sub>3</sub> | -0.59       | 104.50  | < 0.0001*                  |
| X <sub>1</sub> X <sub>4</sub> | -0.01       | 0.04    | 0.8540                     |
| X <sub>2</sub> X <sub>3</sub> | 0.48        | 70.14   | < 0.0001*                  |
| X <sub>2</sub> X <sub>4</sub> | 0.06        | 0.94    | 0.3526                     |
| X <sub>3</sub> X <sub>4</sub> | -0.29       | 26.02   | 0.0003*                    |
| X <sub>1</sub> <sup>2</sup>   | 0.01        | 0.01    | 0.9066                     |
| X <sub>2</sub> <sup>2</sup>   | 0.15        | 9.34    | 0.0100*                    |
| X <sub>3</sub> <sup>2</sup>   | 0.32        | 42.11   | < 0.0001*                  |
| X <sub>4</sub> <sup>2</sup>   | 0.60        | 146.85  | < 0.0001*                  |

Note: \* indicates significant impact.

**Table S5.** Fitness of the viscosity to different models.

| Model                | Sequential <i>p</i> -value | Lack of fit <i>p</i> -value | Adjusted R <sup>2</sup> | Predicted R <sup>2</sup> |
|----------------------|----------------------------|-----------------------------|-------------------------|--------------------------|
| Linear               | < 0.0001                   | 0.0319                      | 0.8988                  | 0.8675                   |
| 2FI                  | 0.0208                     | 0.0513                      | 0.9399                  | 0.9144                   |
| Quadratic polynomial | 0.0004                     | 0.1696                      | 0.9836                  | 0.9572                   |
| Cubic polynomial     | 0.7274                     | 0.0831                      | 0.9783                  | 0.5590                   |

**Table S6.** The ANOVA for the viscosity

| Source                        | Coefficient | F-value | Sequential p-value |
|-------------------------------|-------------|---------|--------------------|
| Model                         | -           | 112.04  | < 0.0001           |
| Lack of Fit                   | -           | 5.28    | 0.1696             |
| Intercept                     | 254.21      | -       | -                  |
| X <sub>1</sub>                | 2.16        | 2.74    | 0.1235             |
| X <sub>2</sub>                | 21.25       | 265.43  | < 0.0001*          |
| X <sub>3</sub>                | 37.57       | 829.37  | < 0.0001*          |
| X <sub>4</sub>                | 24.32       | 347.70  | < 0.0001*          |
| X <sub>1</sub> X <sub>2</sub> | 7.76        | 23.58   | 0.0004*            |
| X <sub>1</sub> X <sub>3</sub> | 5.86        | 13.47   | 0.0032*            |
| X <sub>1</sub> X <sub>4</sub> | -2.49       | 2.42    | 0.1456             |
| X <sub>2</sub> X <sub>3</sub> | -1.31       | 0.67    | 0.4287             |
| X <sub>2</sub> X <sub>4</sub> | 9.01        | 31.78   | 0.0001*            |
| X <sub>3</sub> X <sub>4</sub> | 3.55        | 4.94    | 0.0462*            |
| X <sub>1</sub> <sup>2</sup>   | -8.36       | 36.53   | < 0.0001*          |
| X <sub>2</sub> <sup>2</sup>   | -2.14       | 2.40    | 0.1474             |
| X <sub>3</sub> <sup>2</sup>   | 1.29        | 0.88    | 0.3680             |
| X <sub>4</sub> <sup>2</sup>   | -2.16       | 2.43    | 0.1452             |

Note: \* indicates significant impact.

**Table S7.** Constraints for the multiple-response optimization.

| Name                              | Goal     | Lower limit | Upper limit | Lower weight | Upper weight | Importance |
|-----------------------------------|----------|-------------|-------------|--------------|--------------|------------|
| X <sub>1</sub> : Tersperse2700    | Range    | -2.00       | 2.00        | 1            | 1            | 3          |
| X <sub>2</sub> : AE1601           | Range    | -2.00       | 2.00        | 1            | 1            | 3          |
| X <sub>3</sub> : Xanthan gum      | Range    | -2.00       | 2.00        | 1            | 1            | 3          |
| X <sub>4</sub> : Veegum           | Range    | -2.00       | 2.00        | 1            | 1            | 3          |
| Aqueous separation ratio/%        | Minimize | 1.22        | 5.00        | 1            | 1            | 3          |
| Centrifugal sedimentation ratio/% | Minimize | 2.31        | 5.00        | 1            | 1            | 3          |
| Viscosity/ mPa·s                  | Minimize | 160.34      | 345.78      | 1            | 1            | 1          |
